# Supplementary material for: Sorting drug conformers in enzyme active sites: the XTB way
Source: Royal Society of Chemistry journal article supplement (doi:10.1039/d4cp00930d), 2024-01-01
Supplement: d4cp00930d3.xlsx [file d4cp00930d3.xlsx]

## Sheet: MEI196-binding-energy
folder	species	binding energies											deviations from references
* binding energies in kJ/mol		reference	B97M-V/mTZVP	B97M-V/mSVP+gCP	B97M-V/vDZP	ωB97X-3c	MPW91-D4/vDZP	PBE-D4/vDZP	XTB1	XTB2	PM6	PM7	B97M-V/mTZVP	B97M-V/mSVP+gCP	B97M-V/vDZP	ωB97X-3c	MPW91-D4/vDZP	PBE-D4/vDZP	XTB1	XTB2	PM6	PM7
prelim_zgly	zgly-in-h2o-01	139.615	143.592	95.9222	135.463	139.101	130.5	138.667	131.385	140.495	115.129	154.907	3.97783	-43.6925	-4.15153	-0.51362	-9.11473	-0.947362	-8.23009	0.880434	-24.4854	15.2927
prelim_zgly	zgly-in-h2o-02	134.94	129.615	79.3689	126.994	139.162	129.015	134.991	114.967	139.201	116.926	158.709	-5.32443	-55.5707	-7.94582	4.22211	-5.92441	0.0514678	-19.9725	4.26132	-18.0136	23.7692
prelim_zgly	zgly-in-h2o-03	178.799	181.851	141.075	171.509	179.65	173.393	182.347	156.631	182.703	144.368	175.009	3.05186	-37.7246	-7.29048	0.851086	-5.40607	3.54763	-22.1682	3.90389	-34.4311	-3.79017
prelim_zgly	zgly-in-h2o-04	152.355	154.174	108.173	146.543	151.751	142.761	149.925	128.264	147.336	117.053	158.827	1.81856	-44.1829	-5.81216	-0.604864	-9.59412	-2.42996	-24.0914	-5.01933	-35.3027	6.47159
prelim_zgly	zgly-in-h2o-05	127.589	124.388	77.3972	120.667	129.804	119.994	126.117	122.659	147.655	116.45	154.17	-3.20065	-50.1918	-6.92186	2.21499	-7.59459	-1.47255	-4.9297	20.0664	-11.1392	26.5811
prelim_zgly	zgly-in-h2o-06	153.701	156.107	124.379	145.736	154.873	149.466	158.73	137.022	158.684	117.209	164.465	2.40537	-29.3226	-7.96501	1.17198	-4.23495	5.02926	-16.6789	4.98264	-36.4923	10.7638
prelim_zgly	zgly-in-h2o-07	167.663	172.206	141.032	164.39	172.604	162.851	170.495	161.48	175.804	149.143	196.438	4.543	-26.6308	-3.27311	4.94165	-4.81209	2.83233	-6.18297	8.14164	-18.52	28.775
prelim_zgly	zgly-in-h2o-08	123.403	123.019	77.2641	117.573	125.731	116.336	121.899	112.466	135.635	109.833	146.559	-0.384611	-46.1392	-5.82988	2.32752	-7.06706	-1.50414	-10.9369	12.232	-13.5699	23.1556
prelim_zgly	zgly-in-h2o-09	142.528	145.999	106.663	134.148	140.739	137.192	145.976	119.231	140.953	102.365	141.427	3.47084	-35.8655	-8.38016	-1.78899	-5.33586	3.44815	-23.2972	-1.57498	-40.1633	-1.1014
prelim_zgly	zgly-in-h2o-10	159.384	165.108	134.563	153.026	160.358	156.533	165.894	140.001	161.798	122.518	178.485	5.72379	-24.8215	-6.35839	0.974256	-2.8516	6.50946	-19.3835	2.41393	-36.8665	19.1008
prelim_zgly	zgly-in-h2o-11	106.432	102.412	51.0572	97.7137	106.877	98.8065	104.741	87.8247	109.316	89.5078	122.269	-4.02018	-55.375	-8.71858	0.444331	-7.62574	-1.69146	-18.6075	2.88388	-16.9245	15.8365
prelim_zgly	zgly-in-h2o-12	133.105	133.925	88.7532	125.119	134.767	129.215	137.727	119.302	139.746	103.305	155.562	0.819971	-44.3523	-7.98622	1.6617	-3.89033	4.62178	-13.8037	6.64083	-29.8005	22.4567
prelim_zgly	zgly-in-h2o-13	103.091	99.0187	39.2702	91.7557	99.1018	95.6146	102.374	78.3967	99.9883	63.2013	106.009	-4.07181	-63.8203	-11.3348	-3.98869	-7.47597	-0.716196	-24.6938	-3.10224	-39.8892	2.91824
prelim_zgly	zgly-in-h2o-14	152.268	152.548	116.006	146.579	156.05	146.648	153.088	138.321	160.549	127.123	179.307	0.28021	-36.2619	-5.68931	3.78171	-5.62036	0.819918	-13.9475	8.28059	-25.1452	27.0384
prelim_zgly	zgly-in-h2o-15	121.322	125.92	88.1018	113.78	118.539	115.738	123.858	99.6748	119.425	78.4339	118.915	4.59764	-33.2205	-7.54205	-2.78286	-5.58417	2.53548	-21.6474	-1.89765	-42.8883	-2.40758
prelim_zgly	zgly-in-h2o-16	110.461	109.274	60.7906	104.944	111.302	104.705	111.348	99.4791	115.156	93.7708	130.378	-1.18672	-49.6705	-5.51747	0.840558	-5.75658	0.88738	-10.982	4.69523	-16.6903	19.917
prelim_zgly	zgly-in-h2o-17	141.717	145.53	114.229	136.12	143.593	138.138	146.65	140.288	159.435	119.837	177.96	3.81337	-27.4875	-5.5966	1.87607	-3.57863	4.93338	-1.42869	17.7181	-21.8796	36.2432
prelim_zgly	zgly-in-h2o-18	140.11	137.298	97.4694	131.748	143.343	136.078	142.513	123.795	152.59	115.47	155.045	-2.81185	-42.6406	-8.36164	3.23252	-4.03176	2.40248	-16.315	12.48	-24.6398	14.9354
prelim_zgly	zgly-in-h2o-19	153.116	158.818	127.2	148.912	155.269	149.554	158.061	141.682	158.274	125.567	175.68	5.70179	-25.9157	-4.20357	2.15258	-3.56221	4.94497	-11.4337	5.15807	-27.5491	22.5641
prelim_zgly	zgly-in-h2o-20	149.245	155.576	118.759	143.331	147.614	144.499	153.245	124.53	141.898	102.4	154.873	6.33135	-30.4862	-5.91413	-1.63115	-4.74647	3.99966	-24.7145	-7.34688	-46.8447	5.62802
prelim_nh4	nh4-in-h2o-01	231.981	241.869	262.683	234.218	237.49	246.376	249.669	236.306	250.946	176.286	194.793	9.88793	30.7023	2.23744	5.50931	14.3948	17.6877	4.32455	18.9649	-55.6953	-37.1884
prelim_nh4	nh4-in-h2o-02	200.432	207.718	222.729	200.647	203.227	210.651	214.156	199.063	213.102	148.194	169.773	7.28564	22.2973	0.215103	2.79488	10.2185	13.724	-1.36911	12.6697	-52.2379	-30.6591
prelim_nh4	nh4-in-h2o-03	276.828	283.883	303.205	279.711	287.017	283.994	290.958	285.127	292.856	236.84	280.305	7.05511	26.3767	2.88267	10.1888	7.16571	14.1297	8.29951	16.028	-39.9884	3.47729
prelim_nh4	nh4-in-h2o-04	262.237	273.87	303.347	266.692	270.423	280.775	284.043	267.151	283.925	205.201	223.572	11.6328	41.1099	4.45462	8.1861	18.5376	21.8062	4.91387	21.6878	-57.0357	-38.6646
prelim_nh4	nh4-in-h2o-05	317.795	329.775	350.725	320.972	326.744	331.475	339.621	313.436	339.695	261.971	327.865	11.9799	32.9301	3.17664	8.94846	13.6802	21.8262	-4.35952	21.9002	-55.8238	10.0697
prelim_nh4	nh4-in-h2o-06	245.958	257.233	280.578	247.693	250.949	258.786	263.769	254.535	275.141	196.363	210.355	11.2749	34.6202	1.73526	4.99144	12.8277	17.811	8.57713	29.1828	-49.5949	-35.6031
prelim_nh4	nh4-in-h2o-07	112.43	115.431	124.054	112.372	115.329	120.013	121.894	112.363	121.638	82.3982	83.9979	3.00083	11.6243	-0.0582153	2.89908	7.58329	9.46405	-0.0666475	9.20806	-30.0316	-28.4319
prelim_nh4	nh4-in-h2o-08	207.649	212.76	224.381	207.394	211.54	216.541	220.029	207.093	217.952	157.653	178.643	5.1104	16.732	-0.255041	3.89038	8.89207	12.3801	-0.555976	10.3031	-49.996	-29.0059
prelim_nh4	nh4-in-h2o-09	468.58	482.575	517.638	481.471	486.984	477.437	478.42	441.309	445.392	348.648	341.458	13.9952	49.0583	12.8909	18.4038	8.85736	9.84022	-27.2709	-23.1879	-119.932	-127.122
prelim_nh4	nh4-in-h2o-10	287.947	298.453	322.562	290.031	295.627	302.767	308.755	283.801	307.506	231.565	265.054	10.5067	34.6151	2.0839	7.67991	14.82	20.8078	-4.14595	19.5595	-56.3814	-22.8923
prelim_hco2	hco2-in-h2o-01	288.056	293.68	293.501	293.967	303.59	298.891	304.848	277.493	267.102	273.897	286.064	5.62396	5.44568	5.9116	15.5344	10.8357	16.7926	-10.5625	-20.9538	-14.1585	-1.99197
prelim_hco2	hco2-in-h2o-02	286.464	289.389	278.816	288.212	296.775	291.804	299.153	268.926	260.773	253.244	280.626	2.92509	-7.64862	1.74716	10.3103	5.33954	12.6888	-17.5386	-25.6914	-33.2207	-5.83832
prelim_hco2	hco2-in-h2o-03	280.305	285.987	292.213	287.229	295.029	292.419	298.83	268.848	257.906	261.436	279.612	5.68169	11.9079	6.92362	14.7235	12.1135	18.5245	-11.4572	-22.3995	-18.8692	-0.693132
prelim_hco2	hco2-in-h2o-04	288.501	294.325	293.765	294.54	304.036	299.118	305.1	278.429	267.56	274.931	286.943	5.82352	5.26345	6.03848	15.5345	10.6167	16.5992	-10.0721	-20.9414	-13.5704	-1.5585
prelim_hco2	hco2-in-h2o-05	223.555	226.368	228.119	228.382	235.07	235.253	240.498	215.49	205.785	206.52	218.805	2.81319	4.56407	4.82746	11.5154	11.6984	16.9429	-8.06496	-17.7697	-17.035	-4.74953
prelim_hco2	hco2-in-h2o-06	248.334	252.313	249.517	253.739	260.978	257.344	262.11	239.273	228.859	236.626	249.833	3.97872	1.18248	5.40425	12.6436	9.00947	13.7756	-9.06189	-19.4758	-11.7084	1.49864
prelim_hco2	hco2-in-h2o-07	254.335	258.151	262.613	259.854	268.905	267.445	272.348	245.807	238.508	243.561	255.503	3.81581	8.27797	5.51894	14.5699	13.1104	18.0129	-8.52734	-15.8268	-10.7735	1.16861
prelim_hco2	hco2-in-h2o-08	296.622	302.424	301.029	302.924	311.044	306.293	314.16	282.084	270.186	273.496	296.258	5.80111	4.40686	6.30182	14.4212	9.67058	17.5371	-14.5382	-26.4368	-23.1267	-0.364682
prelim_hco2	hco2-in-h2o-09	254.25	259.794	262.627	260.969	267.576	264.506	268.417	248.219	233.234	245.619	257.381	5.54356	8.37684	6.7191	13.3257	10.2558	14.1674	-6.03093	-21.0157	-8.63133	3.13143
prelim_hco2	hco2-in-h2o-10	266.947	273.147	272.096	271.389	279.435	277.683	283.902	255.705	241.498	246.756	253.978	6.19963	5.14921	4.44237	12.4882	10.7361	16.9553	-11.242	-25.449	-20.1906	-12.9692
prelim_enzyme	drug-enz-frag-01	613.03	616.972	659.956	615.387	615.344	613.965	616.684	607.713	663.419	507.77	566.026	3.94186	46.9262	2.35717	2.31372	0.935167	3.6542	-5.31691	50.3893	-105.26	-47.0045
prelim_enzyme	drug-enz-frag-02	559.825	563.548	614.181	561.063	557.309	562.691	565.331	582.108	690.204	455.638	511.625	3.72241	54.3558	1.23753	-2.51616	2.86595	5.50543	22.2829	130.379	-104.187	-48.2005
prelim_enzyme	drug-enz-frag-03	79.9016	85.0211	89.4687	83.4516	82.619	84.3109	86.2484	78.6272	70.4019	66.045	71.3782	5.11953	9.56709	3.55004	2.71745	4.40931	6.34687	-1.27436	-9.49972	-13.8566	-8.52342
prelim_enzyme	drug-enz-frag-04	-1.37419	-0.880024	-3.03229	-0.290112	-2.74198	-3.60487	-1.56675	6.22617	-0.435225	-0.119723	8.16898	0.494163	-1.65811	1.08407	-1.36779	-2.23069	-0.192568	7.60035	0.938962	1.25446	9.54317
prelim_enzyme	drug-enz-frag-05	-1.73887	-1.72851	-1.36732	-1.83455	-2.28565	-1.53753	-1.32229	-1.61896	-2.34594	-3.24932	-0.147816	0.0103616	0.371547	-0.0956815	-0.546784	0.201339	0.416582	0.119911	-0.607067	-1.51045	1.59105
prelim_enzyme	drug-enz-frag-06	2.34982	2.0282	2.41688	2.17177	0.817739	1.91251	3.0583	4.9737	5.97106	1.24396	6.73677	-0.321619	0.0670577	-0.178051	-1.53208	-0.437312	0.708481	2.62388	3.62124	-1.10586	4.38695
prelim_enzyme	drug-enz-frag-07	134.9	140.785	139.277	135.366	138.208	129.407	132.631	105.085	106.497	91.1784	101.427	5.88594	4.37739	0.466869	3.30818	-5.49291	-2.26835	-29.815	-28.4023	-43.7211	-33.4728
prelim_enzyme	drug-enz-frag-08	41.3732	43.5994	41.8165	41.4874	41.6256	40.4826	41.881	37.7821	31.3128	26.1224	34.6747	2.22622	0.443329	0.114229	0.252459	-0.890516	0.507821	-3.59104	-10.0604	-15.2507	-6.69844
prelim_enzyme	drug-enz-frag-09	92.467	99.5133	102.395	96.2332	95.4444	99.2538	101.309	83.0235	78.9671	60.6475	61.3813	7.04638	9.92769	3.76626	2.97748	6.7868	8.84184	-9.44344	-13.4999	-31.8195	-31.0857
prelim_enzyme	drug-enz-frag-10	18.0624	18.6457	18.6665	18.6736	18.5765	18.1608	19.0532	18.6154	17.6936	13.3945	21.4259	0.583319	0.604107	0.611245	0.514096	0.0984506	0.990777	0.552987	-0.368785	-4.66788	3.36353
prelim_enzyme	drug-enz-frag-11	45.2925	47.0913	30.9196	43.2283	45.3618	45.4575	49.1201	43.6629	47.1264	38.7209	70.5062	1.79881	-14.3729	-2.06419	0.0693076	0.164983	3.82763	-1.62959	1.83392	-6.57163	25.2137
prelim_enzyme	drug-enz-frag-12	33.217	35.7814	17.9484	32.0524	32.1961	32.4917	34.3075	33.7021	37.4139	30.1434	64.2163	2.5644	-15.2686	-1.16467	-1.02093	-0.725291	1.0905	0.485074	4.19682	-3.07367	30.9993
prelim_enzyme	drug-enz-frag-13	4.16431	5.9382	5.97894	4.40602	2.93464	4.43467	5.67535	2.82753	-0.709102	-3.94849	1.36657	1.7739	1.81463	0.241712	-1.22966	0.270364	1.51104	-1.33677	-4.87341	-8.11279	-2.79773
prelim_enzyme	drug-enz-frag-14	24.5954	26.8159	18.8518	23.7932	23.2873	24.5509	27.3449	22.1471	21.1672	12.8786	34.2423	2.2205	-5.74367	-0.802191	-1.30812	-0.0445393	2.74953	-2.44837	-3.42824	-11.7168	9.64687
prelim_enzyme	drug-enz-frag-15	10.977	12.7099	13.0352	9.82668	8.26839	10.427	11.6452	4.5486	0.703047	-2.75494	5.27515	1.73296	2.05828	-1.15027	-2.70856	-0.549965	0.66826	-6.42836	-10.2739	-13.7319	-5.7018
h2o_in_h2o	h2o-in-h2o-01	28.6439	33.0069	13.5951	25.0418	26.1954	26.3241	33.9179	42.1187	40.488	31.4028	44.9924	4.36301	-15.0489	-3.60212	-2.44849	-2.31981	5.274	13.4748	11.8441	2.75889	16.3485
h2o_in_h2o	h2o-in-h2o-02	57.4472	63.5692	47.8275	53.891	54.601	54.8639	63.0538	68.5098	67.8311	45.4051	61.2088	6.12201	-9.61965	-3.55622	-2.84619	-2.5833	5.60665	11.0626	10.3839	-12.0421	3.76161
h2o_in_h2o	h2o-in-h2o-03	69.7575	76.667	61.8398	66.382	66.6254	67.7869	75.6017	78.6613	79.3784	51.4685	68.5038	6.90953	-7.91766	-3.3755	-3.13214	-1.97054	5.84421	8.9038	9.62087	-18.289	-1.25373
h2o_in_h2o	h2o-in-h2o-04	71.2851	78.106	62.902	68.7101	67.7298	69.5279	77.0219	79.912	83.9431	52.8114	72.8004	6.82094	-8.38307	-2.57499	-3.5553	-1.75717	5.7368	8.62688	12.658	-18.4737	1.5153
h2o_in_h2o	h2o-in-h2o-05	76.4147	83.0979	69.6947	73.9129	73.069	74.4833	81.8828	86.5123	93.1727	58.8582	79.3962	6.68318	-6.71995	-2.5018	-3.34565	-1.93135	5.4681	10.0976	16.758	-17.5565	2.98148
h2o_in_meoh	h2o-in-meoh-01	35.9676	40.2262	35.1598	34.3483	34.526	34.2454	40.3994	37.9584	31.1715	22.6515	32.5751	4.2586	-0.807805	-1.61936	-1.44162	-1.72223	4.4318	1.99073	-4.79615	-13.3161	-3.39252
h2o_in_meoh	h2o-in-meoh-02	52.5747	56.5544	52.4076	50.3492	51.5148	50.1717	56.5037	51.5961	46.3138	35.8764	47.452	3.97969	-0.167077	-2.22554	-1.0599	-2.40301	3.92901	-0.978605	-6.26088	-16.6983	-5.12275
h2o_in_meoh	h2o-in-meoh-03	50.3301	54.6371	50.0709	48.2062	48.5731	47.5773	53.812	49.8665	44.0015	32.5662	46.2419	4.30708	-0.259178	-2.1239	-1.75697	-2.75273	3.48195	-0.463578	-6.32856	-17.7639	-4.08818
h2o_in_meoh	h2o-in-meoh-04	52.8401	57.216	52.9202	50.6406	51.152	50.277	56.4549	51.8445	46.4115	34.11	47.7962	4.3759	0.0800853	-2.19945	-1.68811	-2.5631	3.6148	-0.995551	-6.4286	-18.7301	-5.0439
h2o_in_meoh	h2o-in-meoh-05	56.8735	61.2605	57.3202	54.7069	55.3659	54.4644	60.6329	55.8895	50.6557	37.809	51.5464	4.38695	0.446682	-2.16663	-1.50767	-2.40912	3.75937	-0.984068	-6.21783	-19.0645	-5.32709
h2o_in_ch2cl2	h2o-in-ch2cl2-01	19.4524	26.9974	28.7379	22.6114	21.2901	21.1625	24.9499	13.9844	17.8557	10.9898	31.5065	7.54498	9.28554	3.15904	1.83773	1.71017	5.49753	-5.46795	-1.59662	-8.46256	12.0542
h2o_in_ch2cl2	h2o-in-ch2cl2-02	23.5113	27.9146	29.5335	23.4733	22.0018	21.8662	25.6536	14.665	18.3985	11.6635	32.9217	4.40327	6.02217	-0.0379993	-1.50956	-1.64516	2.1423	-8.84637	-5.11287	-11.8478	9.41032
h2o_in_ch2cl2	h2o-in-ch2cl2-03	24.3832	29.1339	30.6257	24.7305	23.1044	22.8767	26.6354	15.3725	19.0013	12.887	34.5206	4.75068	6.24254	0.347328	-1.27878	-1.50652	2.2522	-9.01068	-5.38185	-11.4962	10.1374
h2o_in_ch2cl2	h2o-in-ch2cl2-04	25.6444	30.1983	31.6722	25.773	24.0071	23.8582	27.6137	15.7007	19.4819	13.6169	35.4374	4.55392	6.02777	0.1286	-1.63733	-1.78621	1.9693	-9.94368	-6.16253	-12.0275	9.79301
h2o_in_ch2cl2	h2o-in-ch2cl2-05	26.8445	22.4736	24.2803	18.5578	17.5882	17.6695	21.0108	11.9696	14.9631	8.35119	24.9879	-4.37093	-2.56418	-8.28673	-9.2563	-9.175	-5.83371	-14.8749	-11.8814	-18.4933	-1.85656
meoh_in_h2o	meoh-in-h2o-01	38.3955	46.9402	33.5434	37.2535	34.6374	35.8284	42.5784	38.572	34.5753	24.9877	37.3448	8.54466	-4.85215	-1.14204	-3.75811	-2.56711	4.18283	0.17644	-3.8202	-13.4079	-1.05067
meoh_in_h2o	meoh-in-h2o-02	42.4135	52.4542	39.6671	43.0882	36.8697	35.7486	44.363	46.9771	43.4542	24.0057	47.8046	10.0408	-2.74634	0.674748	-5.54381	-6.66485	1.94958	4.56362	1.04079	-18.4077	5.39112
meoh_in_h2o	meoh-in-h2o-03	62.6223	72.5933	61.0175	64.369	57.0346	56.2428	64.5827	63.6462	62.8452	35.9074	68.3554	9.971	-1.60476	1.74667	-5.58768	-6.37949	1.96042	1.02389	0.222848	-26.7149	5.73311
meoh_in_h2o	meoh-in-h2o-04	62.618	71.8964	60.5071	64.3827	56.513	55.8839	64.0688	64.0386	63.1858	34.6175	69.5521	9.27839	-2.11085	1.76472	-6.10498	-6.73411	1.45084	1.42059	0.56785	-28.0005	6.93415
meoh_in_h2o	meoh-in-h2o-05	65.0279	74.4417	62.7052	66.8879	58.6771	57.9896	65.9195	67.2585	66.3141	37.2753	74.8974	9.41379	-2.32277	1.85994	-6.35079	-7.03833	0.891607	2.23059	1.28616	-27.7527	9.86945
meoh_in_meoh	meoh-in-meoh-01	35.531	35.7688	21.179	31.3554	33.4864	37.4731	43.3565	15.0189	18.3916	6.36474	20.0047	0.237847	-14.3519	-4.17552	-2.04451	1.94218	7.82559	-20.5121	-17.1394	-29.1662	-15.5262
meoh_in_meoh	meoh-in-meoh-02	57.1418	58.5907	46.3156	53.2526	55.5522	60.5787	66.7122	32.0507	36.1361	15.397	33.0997	1.44894	-10.8262	-3.88919	-1.58963	3.4369	9.57037	-25.0911	-21.0056	-41.7448	-24.0421
meoh_in_meoh	meoh-in-meoh-03	71.1237	72.817	61.2119	67.3287	69.6207	74.4185	80.8154	43.7615	49.1981	24.4355	46.5141	1.6933	-9.91173	-3.795	-1.50301	3.29484	9.69169	-27.3621	-21.9255	-46.6881	-24.6095
meoh_in_meoh	meoh-in-meoh-04	71.383	72.9092	61.161	67.6052	69.0885	74.4151	80.6656	43.83	49.2329	23.1569	49.3163	1.52618	-10.222	-3.7778	-2.29454	3.03213	9.28257	-27.553	-22.1501	-48.2261	-22.0667
meoh_in_meoh	meoh-in-meoh-05	77.0105	78.2816	66.8822	72.9625	74.4706	79.9188	86.11	47.7608	53.7361	26.3826	52.5252	1.27109	-10.1283	-4.04799	-2.53986	2.90832	9.09954	-29.2497	-23.2744	-50.6279	-24.4852
meoh_in_ch2cl2	meoh-in-ch2cl2-01	34.852	38.121	43.7445	34.2675	26.7388	26.2513	31.418	31.1418	23.4087	21.6268	56.463	3.26898	8.89247	-0.584532	-8.11322	-8.6007	-3.434	-3.71022	-11.4433	-13.2252	21.611
meoh_in_ch2cl2	meoh-in-ch2cl2-02	37.6368	40.7401	46.7022	37.0852	28.342	28.0833	33.7554	33.3434	24.9586	20.6191	63.4266	3.10333	9.06538	-0.551601	-9.29479	-9.55352	-3.88138	-4.29343	-12.6782	-17.0177	25.7898
meoh_in_ch2cl2	meoh-in-ch2cl2-03	38.974	42.3136	47.6738	38.6488	28.495	28.6773	34.188	34.9002	25.9146	20.1161	66.961	3.33957	8.69979	-0.325223	-10.479	-10.2968	-4.78608	-4.07387	-13.0594	-18.858	27.987
meoh_in_ch2cl2	meoh-in-ch2cl2-04	40.2263	43.5637	48.9447	39.7731	29.3524	29.5978	35.0756	35.7413	26.5933	20.6574	68.2609	3.33743	8.71839	-0.453177	-10.8739	-10.6285	-5.1507	-4.485	-13.633	-19.5689	28.0346
meoh_in_ch2cl2	meoh-in-ch2cl2-05	41.5872	45.0107	50.2229	41.1205	30.5345	30.7517	36.2032	36.8959	27.499	21.7657	69.9672	3.42354	8.63569	-0.466629	-11.0526	-10.8355	-5.38397	-4.69124	-14.0881	-19.8215	28.38
ch2cl2_in_h2o	ch2cl2-in-h2o-01	40.6346	45.4076	54.5163	38.8855	33.5462	32.8303	38.9327	37.9467	46.0297	30.2985	59.4111	4.77305	13.8817	-1.74909	-7.08844	-7.80432	-1.70193	-2.68787	5.39508	-10.3361	18.7765
ch2cl2_in_h2o	ch2cl2-in-h2o-02	52.7734	57.4266	67.4526	50.2086	43.3389	41.9686	49.1793	42.3719	51.3006	34.5127	75.9788	4.65321	14.6792	-2.56481	-9.4345	-10.8048	-3.59408	-10.4015	-1.47282	-18.2607	23.2054
ch2cl2_in_h2o	ch2cl2-in-h2o-03	60.0421	65.2042	74.402	57.2658	48.2294	46.8617	54.6909	48.1058	56.5288	37.7376	92.7033	5.16214	14.3599	-2.77623	-11.8127	-13.1803	-5.35119	-11.9363	-3.51324	-22.3044	32.6612
ch2cl2_in_h2o	ch2cl2-in-h2o-04	59.606	64.2911	73.7755	58.0315	47.013	46.3684	53.2331	47.9377	50.1723	36.7349	99.8661	4.68513	14.1695	-1.57449	-12.593	-13.2376	-6.3729	-11.6682	-9.43371	-22.871	40.2602
ch2cl2_in_h2o	ch2cl2-in-h2o-05	58.8932	63.4992	72.5243	57.7385	45.7918	45.1318	51.7611	47.7464	49.9556	36.7357	102.708	4.60597	13.6311	-1.15468	-13.1014	-13.7614	-7.13214	-11.1468	-8.93759	-22.1575	43.815
ch2cl2_in_meoh	ch2cl2-in-meoh-01	29.7614	32.986	36.3642	29.3095	27.9919	28.0962	31.684	23.7022	23.3679	17.8497	35.7782	3.2246	6.60274	-0.451924	-1.76951	-1.6652	1.92258	-6.05919	-6.39351	-11.9117	6.01679
ch2cl2_in_meoh	ch2cl2-in-meoh-02	42.275	45.6359	50.6566	41.301	38.6815	39.9155	44.2201	34.4011	34.8915	23.7894	52.9485	3.3609	8.38162	-0.973935	-3.59348	-2.35942	1.94515	-7.87391	-7.38351	-18.4856	10.6735
ch2cl2_in_meoh	ch2cl2-in-meoh-03	47.4339	50.9017	55.6576	46.3898	43.0485	45.213	49.3904	37.7266	38.2445	25.591	60.0145	3.46776	8.22374	-1.04405	-4.38537	-2.2209	1.95651	-9.70731	-9.18942	-21.8429	12.5806
ch2cl2_in_meoh	ch2cl2-in-meoh-04	51.9817	55.474	60.2967	50.8196	47.4011	49.6041	53.7658	40.8105	41.951	28.169	64.4098	3.49222	8.31496	-1.16217	-4.58063	-2.37763	1.78403	-11.1713	-10.0307	-23.8128	12.4281
ch2cl2_in_meoh	ch2cl2-in-meoh-05	53.0709	56.4434	61.2238	51.8131	47.8185	50.3845	54.4869	41.2611	41.8869	27.9235	65.6346	3.37243	8.1529	-1.25779	-5.25248	-2.68643	1.41601	-11.8098	-11.1841	-25.1474	12.5637
ch2cl2_in_ch2cl2	ch2cl2-in-ch2cl2-01	15.8424	26.9974	28.7379	22.6114	21.2901	21.1625	24.9499	13.9844	17.8557	10.9898	31.5065	11.1549	12.8955	6.76899	5.44768	5.32011	9.10748	-1.858	2.01332	-4.85261	15.6641
ch2cl2_in_ch2cl2	ch2cl2-in-ch2cl2-02	25.6789	27.9146	29.5335	23.4733	22.0018	21.8662	25.6536	14.665	18.3985	11.6635	32.9217	2.23576	3.85466	-2.20551	-3.67707	-3.81267	-0.0252093	-11.0139	-7.28037	-14.0153	7.24281
ch2cl2_in_ch2cl2	ch2cl2-in-ch2cl2-03	30.2126	29.1339	30.6257	24.7305	23.1044	22.8767	26.6354	15.3725	19.0013	12.887	34.5206	-1.07875	0.413115	-5.4821	-7.10821	-7.33595	-3.57723	-14.8401	-11.2113	-17.3256	4.30799
ch2cl2_in_ch2cl2	ch2cl2-in-ch2cl2-04	31.4439	30.1983	31.6722	25.773	24.0071	23.8582	27.6137	15.7007	19.4819	13.6169	35.4374	-1.24557	0.228275	-5.67089	-7.43683	-7.5857	-3.83019	-15.7432	-11.962	-17.827	3.99351
ch2cl2_in_ch2cl2	ch2cl2-in-ch2cl2-05	32.6041	22.4736	24.2803	18.5578	17.5882	17.6695	21.0108	11.9696	14.9631	8.35119	24.9879	-10.1306	-8.32382	-14.0464	-15.0159	-14.9346	-11.5933	-20.6345	-17.641	-24.2529	-7.6162
aspirin_in_h2o	aspirin-in-h2o-01	336.869	338.424	298.104	330.764	335.606	325.046	339.514	312.371	315.701	298.914	345.861	1.55514	-38.7653	-6.10496	-1.26286	-11.8229	2.64557	-24.4977	-21.1675	-37.9546	8.99198
aspirin_in_h2o	aspirin-in-h2o-02	383.874	388.695	362.713	378.043	379.798	365.545	385.425	353.367	354.044	329.895	394.496	4.82037	-21.1617	-5.83143	-4.07587	-18.3296	1.55044	-30.5073	-29.8303	-53.9794	10.622
aspirin_in_h2o	aspirin-in-h2o-03	500.78	504.285	494.435	496.077	499.384	482.401	502.356	455.783	461.083	430.539	508.407	3.50509	-6.34504	-4.70347	-1.39568	-18.3793	1.57613	-44.997	-39.697	-70.2415	7.62693
aspirin_in_h2o	aspirin-in-h2o-04	551.714	554.946	544.212	547.461	545.662	529.713	548.751	487.343	490.335	472.629	559.667	3.23246	-7.50184	-4.25248	-6.05203	-22.0007	-2.96213	-64.3706	-61.3782	-79.0845	7.95347
aspirin_in_h2o	aspirin-in-h2o-05	609.846	611.481	609.116	606.75	605.542	588.687	606.659	541.765	545.093	532.905	620.401	1.63482	-0.729865	-3.0956	-4.3038	-21.1586	-3.1874	-68.0811	-64.7526	-76.9413	10.5553
aspirin_in_pla2	aspirin-in-pla2-01	581.704	583.624	607.829	582.167	579.317	575.342	579.129	566.877	621.369	472.456	550.992	1.91955	26.1242	0.462156	-2.38716	-6.3621	-2.57501	-14.8279	39.6645	-109.248	-30.7129
aspirin_in_pla2	aspirin-in-pla2-02	447.53	450.524	471.914	450.934	428.379	440.102	445.298	403.163	459.193	325.463	414.989	2.99449	24.3843	3.40417	-19.1512	-7.42814	-2.23194	-44.3671	11.6627	-122.067	-32.5405
aspirin_in_pla2	aspirin-in-pla2-03	631.999	636.169	655.352	635.747	609.895	622.237	627.605	578.254	604.66	507.347	605.534	4.16947	23.3523	3.74793	-22.1044	-9.76232	-4.39456	-53.7455	-27.3393	-124.653	-26.4649
aspirin_in_pla2	aspirin-in-pla2-04	647.27	651.224	673.096	650.014	622.975	635.616	640.926	590.382	613.781	510.443	628.967	3.95364	25.8263	2.74374	-24.2945	-11.6539	-6.34369	-56.8875	-33.4889	-136.826	-18.303
aspirin_in_10h2o_fragments	aspirin-h2o-2B-01	66.2035	68.7177	65.0541	66.2123	68.2373	64.2006	66.9942	64.8953	59.2491	61.36	63.1162	2.51418	-1.14943	0.00878059	2.03383	-2.00293	0.790724	-1.30818	-6.95439	-4.84346	-3.08727
aspirin_in_10h2o_fragments	aspirin-h2o-2B-02	51.3454	52.5788	57.0858	52.3225	52.0592	50.5999	52.4529	45.4869	43.3696	42.0566	46.1846	1.2334	5.74044	0.977102	0.713776	-0.745498	1.10753	-5.85847	-7.97578	-9.28883	-5.16076
aspirin_in_10h2o_fragments	aspirin-h2o-2B-03	58.9557	57.7003	52.194	54.8815	59.8371	57.9267	60.1428	55.0759	55.9633	49.2006	57.6875	-1.2554	-6.76168	-4.07414	0.881439	-1.02898	1.18715	-3.87977	-2.99241	-9.75511	-1.26818
aspirin_in_10h2o_fragments	aspirin-h2o-2B-04	0.972885	2.85441	6.67912	0.841379	-1.59265	-0.759526	1.367	4.14136	-0.995796	-0.463401	3.93667	1.88153	5.70623	-0.131505	-2.56553	-1.73241	0.394111	3.16848	-1.96868	-1.43629	2.96379
aspirin_in_10h2o_fragments	aspirin-h2o-2B-05	50.8304	49.671	42.6204	47.3666	49.5001	49.9705	51.9506	42.6967	42.4911	36.3398	44.8659	-1.15946	-8.21005	-3.46388	-1.3303	-0.859896	1.12019	-8.13373	-8.33931	-14.4906	-5.96459
aspirin_in_10h2o_fragments	aspirin-h2o-2B-06	15.6457	16.7167	11.5448	15.1031	13.9944	14.4801	16.0231	12.1567	9.69599	8.09179	11.9851	1.07097	-4.10093	-0.542609	-1.65137	-1.16563	0.377403	-3.48902	-5.94974	-7.55394	-3.66058
aspirin_in_10h2o_fragments	aspirin-h2o-2B-07	47.0096	48.3279	43.3271	46.7609	47.5918	46.3529	48.455	44.9701	39.9529	41.2348	43.8508	1.31831	-3.68256	-0.248758	0.582156	-0.656734	1.44541	-2.03956	-7.05671	-5.77484	-3.15879
aspirin_in_10h2o_fragments	aspirin-h2o-2B-08	11.066	11.6268	10.9359	10.6584	8.53855	10.2392	11.4462	8.05554	7.20185	5.99638	9.20553	0.560885	-0.130042	-0.407562	-2.52742	-0.826761	0.380223	-3.01042	-3.86411	-5.06958	-1.86043
aspirin_in_10h2o_fragments	aspirin-h2o-2B-09	28.2997	29.043	19.9502	28.0107	27.4516	29.1189	31.3329	27.8107	29.2591	24.1024	29.2003	0.743317	-8.34948	-0.288948	-0.848033	0.819193	3.03319	-0.488969	0.959422	-4.19733	0.900606
aspirin_in_10h2o_fragments	aspirin-h2o-2B-10	63.6982	63.7633	62.5275	63.0015	66.0708	62.7772	64.8692	61.9575	59.3899	58.0645	63.1354	0.065134	-1.17069	-0.696656	2.37264	-0.920965	1.17102	-1.74065	-4.30828	-5.63365	-0.562757
aspirin_in_10h2o_fragments	aspirin-h2o-sum(2B)	394.027	401	371.919	385.159	391.688	384.906	405.034	367.247	345.577	325.983	373.168	6.97287	-22.1082	-8.86817	-2.33881	-9.12061	11.007	-26.7803	-48.45	-68.0437	-20.859
aspirin_in_10h2o_fragments	aspirin-h2o-full	336.869	338.424	298.104	330.764	335.606	325.046	339.514	312.371	315.701	298.914	345.861	1.55514	-38.7653	-6.10496	-1.26286	-11.8229	2.64557	-24.4977	-21.1675	-37.9546	8.99198
aspirin_in_pla2B_fragments	aspirin-pla2-2B-01	3.83399	4.29704	2.76162	5.36583	3.0104	2.8668	4.57679	12.2921	2.7361	1.85544	13.6684	0.463054	-1.07237	1.53185	-0.823592	-0.967185	0.742806	8.45814	-1.09789	-1.97855	9.83437
aspirin_in_pla2B_fragments	aspirin-pla2-2B-02	15.6919	14.3619	15.4045	15.6483	15.5747	17.1484	17.4589	11.1762	11.6458	5.07824	16.6491	-1.32995	-0.287307	-0.0435285	-0.117115	1.45655	1.76699	-4.51563	-4.04606	-10.6136	0.957226
aspirin_in_pla2B_fragments	aspirin-pla2-2B-03	-9.74555	-9.62545	-10.0201	-10.0018	-12.3433	-11.3872	-10.0751	-10.2544	-11.4517	-14.2538	-8.40974	0.1201	-0.274577	-0.256272	-2.59776	-1.64165	-0.329514	-0.508863	-1.70612	-4.50829	1.33581
aspirin_in_pla2B_fragments	aspirin-pla2-2B-04	37.0601	40.036	42.3899	37.3032	29.8288	35.817	37.7636	28.9741	21.7223	14.5064	31.3044	2.97591	5.32978	0.243059	-7.23132	-1.24308	0.703502	-8.08599	-15.3378	-22.5537	-5.75576
aspirin_in_pla2B_fragments	aspirin-pla2-2B-05	28.4514	30.006	32.0084	27.4124	16.4017	26.3431	28.0119	15.6365	7.95187	11.067	28.6505	1.55454	3.55692	-1.039	-12.0498	-2.10831	-0.439497	-12.8149	-20.4996	-17.3844	0.199067
aspirin_in_pla2B_fragments	aspirin-pla2-2B-06	23.3074	25.0974	25.1723	24.6534	23.1367	24.8974	26.1169	17.4606	17.5143	11.5876	15.0126	1.79006	1.86498	1.34601	-0.170661	1.59003	2.80953	-5.84678	-5.79306	-11.7197	-8.29476
aspirin_in_pla2B_fragments	aspirin-pla2-2B-07	528.507	531.52	565.668	527.512	524.552	526.091	528.767	532.492	670.64	421.392	478.694	3.01269	37.1608	-0.995294	-3.95471	-2.41626	0.26001	3.9849	142.133	-107.115	-49.8132
aspirin_in_pla2B_fragments	aspirin-pla2-sum(2B)	627.106	635.693	673.384	627.893	600.161	621.776	632.62	607.777	720.759	451.233	575.569	8.58639	46.2782	0.786823	-26.9449	-5.32992	5.51383	-19.3291	93.6526	-175.873	-51.5373
aspirin_in_pla2B_fragments	aspirin-pla2-full	447.529	450.523	471.913	450.933	428.377	440.101	445.297	403.162	459.192	325.462	414.988	2.99453	24.3842	3.40416	-19.1514	-7.42809	-2.2319	-44.3673	11.6627	-122.067	-32.5408
xtra_frames_c6h6	c6h6-in-h2o-frame-01	83.9155	82.7155	95.7033	80.3238	70.376	68.7943	78.8989	56.1479	55.2703	29.9735	97.3522	-1.19999	11.7878	-3.5917	-13.5395	-15.1211	-5.01663	-27.7676	-28.6452	-53.942	13.4367
xtra_frames_c6h6	c6h6-in-h2o-frame-02	48.9884	50.1574	60.5958	46.7229	37.1489	37.1843	45.8443	40.4616	33.9813	10.1869	70.7491	1.169	11.6074	-2.26547	-11.8395	-11.8041	-3.14415	-8.52681	-15.0072	-38.8015	21.7607
xtra_frames_c6h6	c6h6-in-h2o-frame-03	70.8794	68.8619	85.8492	67.6049	56.6999	52.2303	62.8599	52.7095	48.3047	24.9843	96.4136	-2.01742	14.9699	-3.27447	-14.1794	-18.6491	-8.01943	-18.1699	-22.5747	-45.8951	25.5343
xtra_frames_c6h6	c6h6-in-h2o-frame-04	76.1212	76.0358	97.1876	74.2436	58.0548	53.0576	65.0134	63.4732	53.2474	28.6361	106.228	-0.0853384	21.0665	-1.87753	-18.0664	-23.0635	-11.1078	-12.648	-22.8737	-47.4851	30.1071
xtra_frames_c6h6	c6h6-in-h2o-frame-05	93.9065	93.0245	118.494	90.9058	78.0077	73.8208	85.2562	72.0805	60.0718	37.1065	119.746	-0.882009	24.5872	-3.00069	-15.8989	-20.0857	-8.65033	-21.826	-33.8348	-56.8001	25.8399
xtra_frames_h2o	h2o-in-h2o-frame-01	154.686	161.768	162.125	152.407	156.212	159.826	167.215	144.986	153.084	106.01	126.338	7.08218	7.43875	-2.27851	1.52593	5.13994	12.5294	-9.70014	-1.60158	-48.6762	-28.348
xtra_frames_h2o	h2o-in-h2o-frame-02	47.1478	52.4064	34.874	44.6159	44.0734	45.9805	52.6531	54.7746	63.5253	40.8502	57.1978	5.25854	-12.2738	-2.53197	-3.0744	-1.16739	5.50525	7.62674	16.3774	-6.29769	10.05
xtra_frames_h2o	h2o-in-h2o-frame-03	102.711	113.601	106.769	103.316	99.9586	101.052	108.386	104.235	109.53	74.0858	90.543	10.8899	4.05871	0.605452	-2.75196	-1.65837	5.67526	1.52466	6.81936	-28.6248	-12.1676
xtra_frames_h2o	h2o-in-h2o-frame-04	93.8669	102.309	98.6153	94.888	92.1003	90.2066	97.4353	100.013	105.812	63.8543	81.1973	8.4417	4.7484	1.02105	-1.76662	-3.6603	3.56842	6.14651	11.9456	-30.0126	-12.6696
xtra_frames_h2o	h2o-in-h2o-frame-05	76.4147	83.0979	69.6947	73.9129	73.069	74.4833	81.8828	86.5123	93.1727	58.8582	79.3962	6.68318	-6.71995	-2.5018	-3.34565	-1.93135	5.4681	10.0976	16.758	-17.5565	2.98148
xtra_frames_aspirin	aspirin-in-h2o-frame-01	462.5	460.955	437.459	459.17	447.512	440.797	458.054	396.768	391.758	393.198	484.46	-1.54484	-25.0413	-3.32984	-14.988	-21.7032	-4.44614	-65.7317	-70.7423	-69.3024	21.9602
xtra_frames_aspirin	aspirin-in-h2o-frame-02	652.385	653.198	645.676	654.349	647.156	632.464	648.288	596.899	583.77	581.963	673.607	0.813143	-6.70876	1.96402	-5.22846	-19.9209	-4.09701	-55.4851	-68.6148	-70.422	21.2229
xtra_frames_aspirin	aspirin-in-h2o-frame-03	602.743	597.359	583.805	594.639	591.217	573.559	590.118	531.229	521.952	511.335	606.975	-5.38463	-18.9382	-8.10419	-11.5268	-29.1842	-12.6251	-71.5148	-80.7915	-91.408	4.23184
xtra_frames_aspirin	aspirin-in-h2o-frame-04	618.57	617.599	604.059	619.037	621.889	606.157	622.33	554.016	571.17	542.486	642.349	-0.97111	-14.5113	0.466598	3.31867	-12.4135	3.7592	-64.5542	-47.4003	-76.0846	23.7782
xtra_frames_aspirin	aspirin-in-h2o-frame-05	609.846	611.481	609.116	606.75	605.542	588.683	606.657	541.765	545.093	532.905	620.401	1.6348	-0.729865	-3.0957	-4.3038	-21.1629	-3.18862	-68.0811	-64.7526	-76.9413	10.5553
xtra_1oxr_models	1oxr-aca	826.786	827.856	821.55	815.613	776.632	786.152	788.357	746.095	815.707	767.851	1018.27	1.06977	-5.23663	-11.1736	-50.1542	-40.6337	-38.4293	-80.6909	-11.0791	-58.935	191.487
xtra_1oxr_models	1oxr-anisic	754.333	761.458	785.192	750.325	713.584	726.128	728.824	657.88	737.604	688.392	884.277	7.12496	30.8595	-4.0076	-40.7487	-28.2052	-25.5093	-96.4527	-16.7285	-65.941	129.944
xtra_1oxr_models	1oxr-conf-00	647.269	651.141	672.998	649.917	622.842	635.521	640.826	590.239	613.668	510.267	628.757	3.87243	25.7293	2.64841	-24.4267	-11.7474	-6.44255	-57.03	-33.601	-137.002	-18.5117
xtra_1oxr_models	1oxr-conf-01	808.723	810.243	817.564	798.486	760.488	766.705	770.323	727.282	800.777	739.035	971.814	1.51994	8.84058	-10.2373	-48.2351	-42.0184	-38.3998	-81.4411	-7.94608	-69.6881	163.091
xtra_1oxr_models	1oxr-conf-02	726.545	725.639	729.472	714.275	678.866	686.116	687.167	661.678	744.214	661.989	892.235	-0.906121	2.92688	-12.2703	-47.679	-40.4289	-39.3787	-64.8671	17.6683	-64.5563	165.689
xtra_1oxr_models	1oxr-conf-03	717.197	719.966	721.136	709.616	660.05	674.724	676.703	644.052	718.775	662.183	896.521	2.76905	3.93942	-7.58085	-57.1471	-42.4727	-40.4935	-73.1444	1.57861	-55.0142	179.325
xtra_1oxr_models	1oxr-conf-04	733.588	734.606	745.668	722.584	682.57	687.186	691.543	654.557	723.557	656.048	897.484	1.01744	12.0798	-11.0043	-51.0184	-46.4017	-42.0452	-79.0315	-10.0308	-77.5397	163.896
xtra_1oxr_models	1oxr-conf-05	747.82	751.261	743.782	745.346	707.913	719.795	720.631	745.428	750.633	683.857	885.157	3.44091	-4.03767	-2.47383	-39.9069	-28.0248	-27.1889	-2.39131	2.81305	-63.9627	137.337
xtra_1oxr_models	1oxr-conf-06	746.787	745.253	746.814	747.276	724.451	729.901	734.79	699.725	737.452	634.992	758.685	-1.53366	0.0269728	0.489002	-22.3362	-16.8863	-11.9972	-47.0618	-9.33493	-111.795	11.8976
xtra_1oxr_models	1oxr-conf-07	744.372	745.907	739.465	747.423	720.698	726.529	731.753	694.346	721.799	658.725	784.27	1.53487	-4.90757	3.05055	-23.6745	-17.843	-12.6195	-50.0264	-22.5734	-85.647	39.8983
xtra_1oxr_models	1oxr-conf-08	643.089	642.126	633.791	643.9	609.199	622.62	624.619	596.435	630.489	556.76	688.954	-0.96328	-9.29843	0.810968	-33.8906	-20.4687	-18.4699	-46.6537	-12.6004	-86.3287	45.8652
xtra_1oxr_models	1oxr-conf-09	631.081	630.56	633.226	631.698	602.447	609.552	614.536	580.622	617.856	527.282	659.748	-0.520845	2.14471	0.616522	-28.6343	-21.5291	-16.5449	-50.4596	-13.2251	-103.799	28.6665
xtra_1oxr_models	1oxr-conf-10	824.615	821.403	813.483	825.739	804.957	801.795	805.113	809.865	788.029	751.75	893.872	-3.2122	-11.1324	1.12359	-19.658	-22.8201	-19.502	-14.7508	-36.5863	-72.8654	69.2572
xtra_enzyme_models	1tyl	121.386	121.975	100.079	121.17	103.169	110.769	115.717	110.694	90.858	52.7256	145.141	0.588321	-21.3079	-0.216118	-18.2179	-10.6176	-5.66991	-10.6922	-30.5285	-68.6609	23.7549
xtra_enzyme_models	2bxg-a	843.145	852.36	848.709	852.565	820.534	812.495	828.335	859.715	819.965	815.862	913.903	9.21487	5.56424	9.42029	-22.6104	-30.6495	-14.8095	16.5698	-23.1796	-27.2827	70.7584
xtra_enzyme_models	2bxg-b	713.487	717.622	719.062	716.473	700.957	697.948	708.553	716.238	700.169	638.099	735.231	4.13526	5.57569	2.98611	-12.5296	-15.5389	-4.93414	2.75126	-13.3181	-75.3875	21.7442
xtra_enzyme_models	2dpz	110.63	103.751	90.5231	104.164	85.4515	91.6862	96.8999	90.3041	59.1378	57.6513	159.149	-6.87915	-20.1071	-6.46669	-25.1787	-18.944	-13.7303	-20.3261	-51.4924	-52.9789	48.5189
xtra_enzyme_models	2ocu	92.5189	94.6674	93.9669	95.5956	78.8706	80.2768	86.1922	77.1199	65.1025	33.2924	114.756	2.14851	1.44793	3.07667	-13.6483	-12.2421	-6.3267	-15.399	-27.4164	-59.2265	22.237
xtra_enzyme_models	2pws	195.802	187.404	145.17	159.938	164.368	142.161	147.359	157.059	118.272	117.739	215.243	-8.39857	-50.6328	-35.8644	-31.4342	-53.641	-48.4434	-38.743	-77.5305	-78.0637	19.441
xtra_enzyme_models	2wd9	438.133	444.159	446.598	446.158	424.983	424.114	436.491	435.723	400.162	392.608	476.112	6.02626	8.46476	8.02488	-13.1499	-14.0193	-1.64175	-2.40997	-37.9711	-45.5254	37.9791
xtra_enzyme_models	3iaz	-160.669	-159.032	-175.885	-164.224	-169.465	-175.603	-174.727	-196.102	-196.632	-202.484	-158.926	1.63702	-15.2151	-3.55432	-8.79512	-14.9332	-14.0571	-35.4324	-35.9623	-41.8141	1.74371
xtra_enzyme_models	3p6h	402.675	396.22	408.9	411.939	388.21	367.556	378.438	356.872	318.102	322.627	429.385	-6.45503	6.22492	9.26358	-14.4659	-35.1198	-24.237	-45.8038	-84.573	-80.0482	26.7096
xtra_enzyme_models	4a9j	103.437	102.125	95.0926	106.926	84.5279	85.9987	93.5831	95.8027	83.8291	36.5989	137.233	-1.31241	-8.34441	3.48876	-18.9091	-17.4383	-9.85391	-7.63429	-19.6079	-66.838	33.7961
xtra_enzyme_models	4cut	106.56	107.021	104.326	110.662	95.7731	95.7208	104.123	96.4457	85.8192	43.3966	133.37	0.461056	-2.23453	4.10151	-10.7874	-10.8396	-2.43767	-10.1147	-20.7412	-63.1638	26.81
xtra_enzyme_models	4lar	527.091	522.99	535.506	525.155	505.77	509.81	514.444	481.335	476.356	421.082	572.916	-4.10109	8.41546	-1.936	-21.3205	-17.2802	-12.647	-45.7554	-50.7346	-106.008	45.8253
xtra_enzyme_models	4nsb	535.585	530.191	507.39	531.514	516.561	522.615	528.495	526.812	503.612	463.163	597.909	-5.39397	-28.1946	-4.07144	-19.0244	-12.9704	-7.09052	-8.77345	-31.9734	-72.4224	62.324
xtra_enzyme_models	4xp9	339.002	337.546	328.389	339.366	321.098	318.576	327.247	345.881	315.361	256.786	408.425	-1.45631	-10.6128	0.363808	-17.9045	-20.4259	-11.7547	6.87909	-23.6412	-82.2159	69.4233
xtra_enzyme_models	4yji	201.808	208.842	176.323	205.022	177.761	185.209	190.024	177.124	174.417	109.848	265.565	7.03447	-25.4845	3.21398	-24.0472	-16.5993	-11.7843	-24.6836	-27.391	-91.9598	63.757
xtra_enzyme_models	5jqb	588.046	583.199	585.903	589.456	563.033	577.456	584.254	598.526	557.08	541.884	616.768	-4.84634	-2.14232	1.41036	-25.0121	-10.5893	-3.79109	10.4802	-30.9659	-46.1618	28.7225
xtra_enzyme_models	6mqf	281.098	268.437	231.795	270.127	241.673	272.674	277.291	310.574	254.52	213.254	281.696	-12.6614	-49.3035	-10.9716	-39.4259	-8.42464	-3.80797	29.4758	-26.5782	-67.8441	0.597183
xtra_enzyme_models	6oci-a	225.991	223.368	228.6	228.352	194.936	218.167	232.45	234.78	188.13	199.742	285.04	-2.62259	2.6087	2.36132	-31.0551	-7.82371	6.4587	8.78916	-37.8605	-26.2492	59.0485
xtra_enzyme_models	6oci-b	215.483	211.614	219.433	210.594	208.024	195.307	203.803	189.735	175.172	136.275	220.24	-3.86912	3.94936	-4.88911	-7.45902	-20.1765	-11.6807	-25.7486	-40.3114	-79.2081	4.75694
xtra_1oxr_fragments	1oxr-frag-01	4.99049	5.68433	3.88732	6.79434	4.22667	4.31229	6.02824	13.5209	3.07847	2.12167	14.9895	0.693843	-1.10316	1.80385	-0.763813	-0.678199	1.03775	8.53042	-1.91201	-2.86882	9.99902
xtra_1oxr_fragments	1oxr-frag-02	15.289	14.3283	15.3082	15.4201	15.0692	16.6403	16.9622	10.9026	10.8633	4.05771	16.1754	-0.960753	0.0191775	0.131091	-0.219827	1.35123	1.67319	-4.38644	-4.42575	-11.2313	0.886413
xtra_1oxr_fragments	1oxr-frag-03	2.57048	2.42352	2.48615	2.74168	2.70438	3.24088	3.3355	2.59292	2.52901	0.665564	3.92302	-0.146957	-0.0843267	0.171208	0.133901	0.670402	0.765021	0.0224479	-0.0414696	-1.90491	1.35255
xtra_1oxr_fragments	1oxr-frag-04	9.27609	9.48076	10.0869	9.38917	9.36922	10.9873	10.8488	8.24446	9.31944	5.81076	9.79206	0.204665	0.810823	0.113078	0.0931298	1.71117	1.57269	-1.03163	0.0433536	-3.46533	0.515975
xtra_1oxr_fragments	1oxr-frag-05	-6.33576	-6.62659	-6.67931	-6.66284	-8.97025	-7.21623	-5.79432	-5.36659	-5.83599	-10.9688	-3.06763	-0.290823	-0.343543	-0.327077	-2.63449	-0.880464	0.54144	0.969169	0.499773	-4.63305	3.26813
xtra_1oxr_fragments	1oxr-frag-06	3.65181	3.51353	3.79803	3.97795	4.29078	4.9489	5.0454	3.89584	4.28685	2.23483	6.06569	-0.138285	0.146224	0.326136	0.638974	1.29709	1.39359	0.244028	0.635037	-1.41698	2.41388
xtra_1oxr_fragments	1oxr-frag-07	-8.98707	-9.39556	-10.1609	-9.33088	-12.3131	-10.1859	-9.12661	-11.0248	-13.1358	-17.1456	-4.03251	-0.408494	-1.17381	-0.343814	-3.32603	-1.19882	-0.13954	-2.03777	-4.14871	-8.1585	4.95456
xtra_1oxr_fragments	1oxr-frag-08	2.43065	2.56568	2.51648	2.79252	2.05336	2.81005	2.90967	2.22542	1.75686	0.191661	3.63579	0.135028	0.0858345	0.361867	-0.377286	0.379395	0.479022	-0.205226	-0.67379	-2.23899	1.20514
xtra_1oxr_fragments	1oxr-frag-09	-34.1178	-31.2216	-29.9539	-33.4071	-39.8871	-33.1061	-31.6425	-38.4373	-43.1572	-39.6206	-36.7772	2.89625	4.16396	0.710762	-5.76927	1.01173	2.47533	-4.31944	-9.03931	-5.50279	-2.65938
xtra_1oxr_fragments	1oxr-frag-10	37.0601	40.036	42.3899	37.3032	29.8288	35.817	37.7636	28.9741	21.7223	14.5064	31.3044	2.97591	5.32978	0.243059	-7.23132	-1.24308	0.703502	-8.08599	-15.3378	-22.5537	-5.75576
xtra_1oxr_fragments	1oxr-frag-11	8.6245	8.43047	7.40943	8.79889	7.76744	9.11908	9.29495	3.10405	6.44797	2.61447	4.63795	-0.194036	-1.21507	0.174383	-0.857063	0.494578	0.670444	-5.52045	-2.17653	-6.01003	-3.98656
xtra_1oxr_fragments	1oxr-frag-12	28.4514	30.006	32.0084	27.4124	16.4017	26.3431	28.0119	15.6365	7.95187	11.067	28.6505	1.55454	3.55692	-1.039	-12.0498	-2.10831	-0.439497	-12.8149	-20.4996	-17.3844	0.199067
xtra_1oxr_fragments	1oxr-frag-13	-31.2377	-28.903	-29.0287	-31.3054	-38.9223	-32.6945	-30.4674	-45.0402	-44.347	-45.649	-35.7281	2.33469	2.20896	-0.067672	-7.68463	-1.45678	0.770323	-13.8025	-13.1093	-14.4113	-4.49037
xtra_1oxr_fragments	1oxr-frag-14	188.998	209.852	204.115	210.909	187.248	220.537	224.508	196.74	188.6	179.075	186.442	20.854	15.1167	21.9105	-1.74977	31.5386	35.5095	7.74208	-0.397657	-9.92323	-2.55582
xtra_1oxr_fragments	1oxr-frag-15	4.897	4.66646	3.62937	4.68895	4.1298	4.69678	4.95667	2.0574	4.00341	0.625132	3.25877	-0.230536	-1.26763	-0.208052	-0.7672	-0.200218	0.0596706	-2.8396	-0.893584	-4.27187	-1.63823
xtra_1oxr_fragments	1oxr-frag-16	38.1237	39.4967	37.8076	38.8215	39.6308	38.8811	38.9863	26.9371	32.0678	32.9534	32.6447	1.37297	-0.316126	0.697773	1.50711	0.757402	0.862572	-11.1866	-6.05587	-5.17025	-5.47901
xtra_1oxr_fragments	1oxr-frag-17	519.542	521.337	556.033	517.896	516.624	516.076	518.475	518.15	629.586	418.512	474.008	1.79579	36.4914	-1.64513	-2.91782	-3.46532	-1.06645	-1.39187	110.045	-101.03	-45.5335
xtra_1oxr_fragments	1oxr-frag-18	21.7298	23.5956	23.7446	22.6777	21.1213	23.0029	24.2256	16.48	15.2355	9.3985	13.4489	1.86578	2.0148	0.947899	-0.608482	1.27309	2.49577	-5.24981	-6.49433	-12.3313	-8.28096
xtra_1oxr_fragments	1oxr-frag-19	5.12038	4.80005	4.98636	4.75354	5.12306	5.92044	5.95414	3.68279	3.8833	1.01239	7.18337	-0.32033	-0.134025	-0.366837	0.00268185	0.800058	0.833763	-1.43759	-1.23709	-4.10799	2.06299
													1.5 1QR ranges and number of outliers; the outliers are highlighted in red-colored cells above
													11.456	33.3446	7.93965	17.3679	16.5425	15.9848	27.5248	34.1721	52.9436	60.3887
													-6.66355	-33.3598	-10.4679	-27.7151	-27.264	-15.3212	-49.1111	-54.0145	-120.93	-42.6524
													8	26	12	13	13	25	19	14	6	18

## Sheet: validation-binding-energy
species	B97M-V/vDZP	XTB1	XTB2	PM6	PM7	Vina
1ysg_000	113.971	98.2841	83.8249	36.6226	200.226	26.2305		* binding energies in kJ/mol
1ysg_001	119.592	106.466	98.8419	3.98446	173.266	32.5254
1ysg_002	155.301	124.347	121.51	43.3402	207.9	30.9926
1ysg_003	111.662	104.056	95.0287	23.0067	193.039	28.7077
1ysg_004	111.263	102.732	94.5932	25.8291	191.487	28.4569
1ysg_005	115.689	103.523	73.7696	35.7097	153.76	26.8873
1ysg_006	78.7122	60.0703	39.9053	2.43174	120.745	26.8645
4wmv_000	153.575	141.111	114.875	64.9102	198.649	25.0167
4wmv_001	197.297	178.78	152.824	96.3753	225.668	26.4478
4wmv_002	76.9828	79.3463	48.1135	-1.22532	127.884	25.5639
4wmv_003	137.625	126.074	103.975	62.7985	190.048	23.9407
4wmv_004	192.25	178.141	152.69	91.7019	217.396	23.7032
4wmv_005	88.0171	79.1486	49.0086	-4.01649	123.246	22.3664
4wmv_006	102.229	86.0978	77.8841	18.7474	143.378	22.1485
4wmv_007	63.6032	66.351	42.5211	-20.3621	86.7016	21.5645
5mzp_000	159.502	136.435	130.976	53.7437	187.37	20.4479
5mzp_001	116.818	86.6072	65.4337	15.329	129.386	23.5935
5mzp_002	96.1878	75.79	63.793	6.99669	123.793	22.7844
5mzp_003	91.3057	71.7902	60.9651	0.495432	122.263	22.4288
5mzp_004	121.556	111.152	84.1468	29.1641	142.082	22.268
5mzp_005	70.7024	47.0429	36.3269	5.46288	113.49	22.2604
5mzp_006	107.44	78.3768	68.0972	32.1296	140.724	22.194
5mzp_007	119.735	106.887	91.2515	45.9006	159.077	22.0721
5mzp_008	96.1698	71.301	51.9598	25.5527	126.949	21.8462
5mzp_009	79.5983	54.4012	42.2346	-3.71324	111.663	21.8581
7e2y_000	136.021	126.233	102.442	48.848	176.653	17.1426
7e2y_001	93.252	80.2962	50.4217	15.1512	142.466	23.2728
7e2y_002	96.4437	82.8265	55.6312	13.0395	134.709	22.7874
7e2y_003	142.778	118.459	94.8276	46.0405	177.109	22.6787
7e2y_004	112.661	86.1765	66.2307	25.6973	151.698	22.3305
7e2y_005	104.633	74.0642	57.8333	8.56517	131.107	23.4832
8de4_000	116.371	111.934	74.7203	22.5032	168.975	21.5813
8de4_001	120.879	112.647	74.1865	30.3151	174.434	23.0027
8de4_002	111.298	103.205	68.0077	22.0731	151.341	22.7717
8de4_003	110.006	103.172	68.6973	21.8933	151.753	22.7178
8de4_004	89.253	84.6649	42.8804	16.7895	164.16	21.6181
8de4_005	98.3286	95.3774	56.0871	14.2932	151.74	22.1321
8de4_006	141.912	121.63	90.2083	32.6276	167.922	23.8874
8de4_007	143.154	122.698	90.9741	35.25	168.66	23.8297
8de4_008	89.9442	75.9238	38.5634	6.18332	147.832	23.9788
px12_000	110.256	93.5313	84.0734	29.0984	138.138	10.3933
px12_001	121.385	111.251	89.7296	31.6599	133.493	17.6905
px12_002	103.064	92.3406	78.6081	22.0361	122.779	16.4515
px12_003	129.232	112.348	89.0079	36.5764	133.637	15.91
